# Supplementary material
Source: PubMed Central journal article supplement (PMC9203605)
Supplement: NIHMS1754544-supplement-Supplementary_Figures_1-2.pdf [file NIHMS1754544-supplement-Supplementary_Figures_1-2.pdf]

# Figure S1

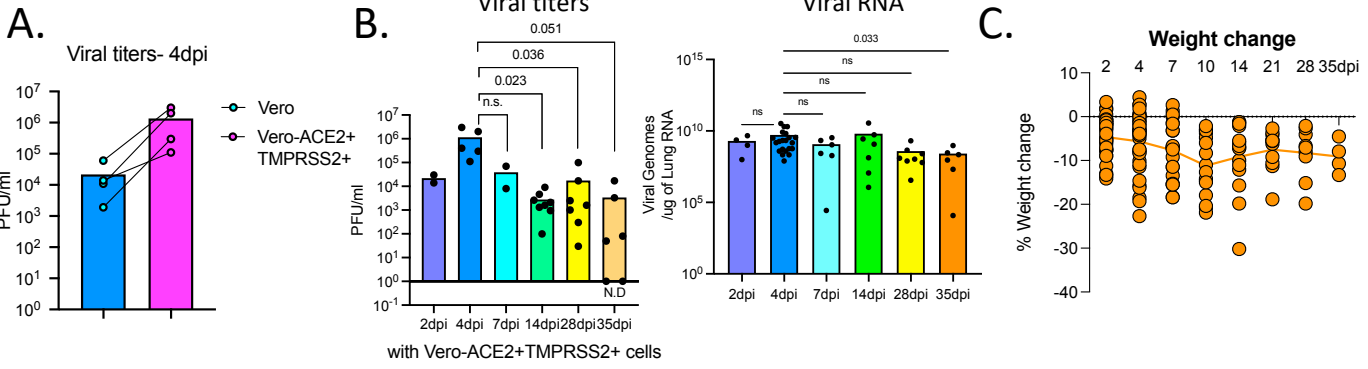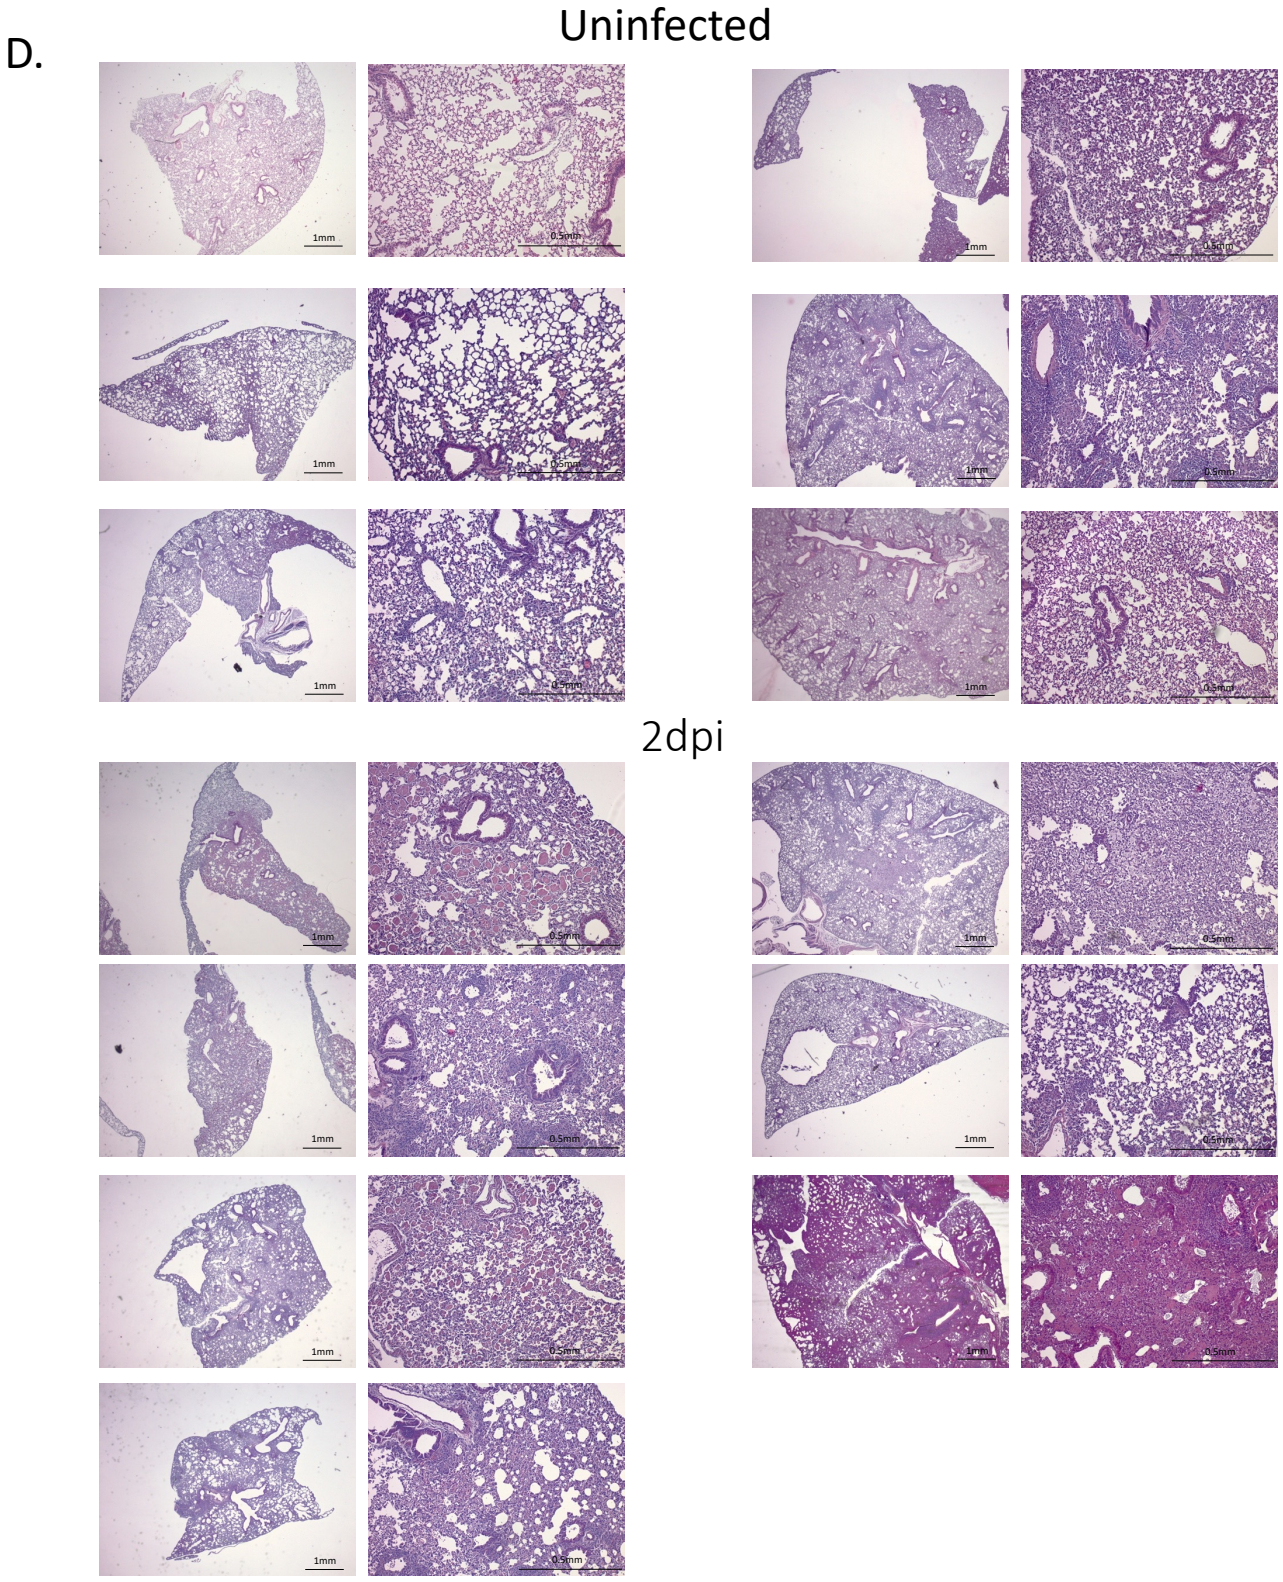

Figure S1 continued

D.

4dpi

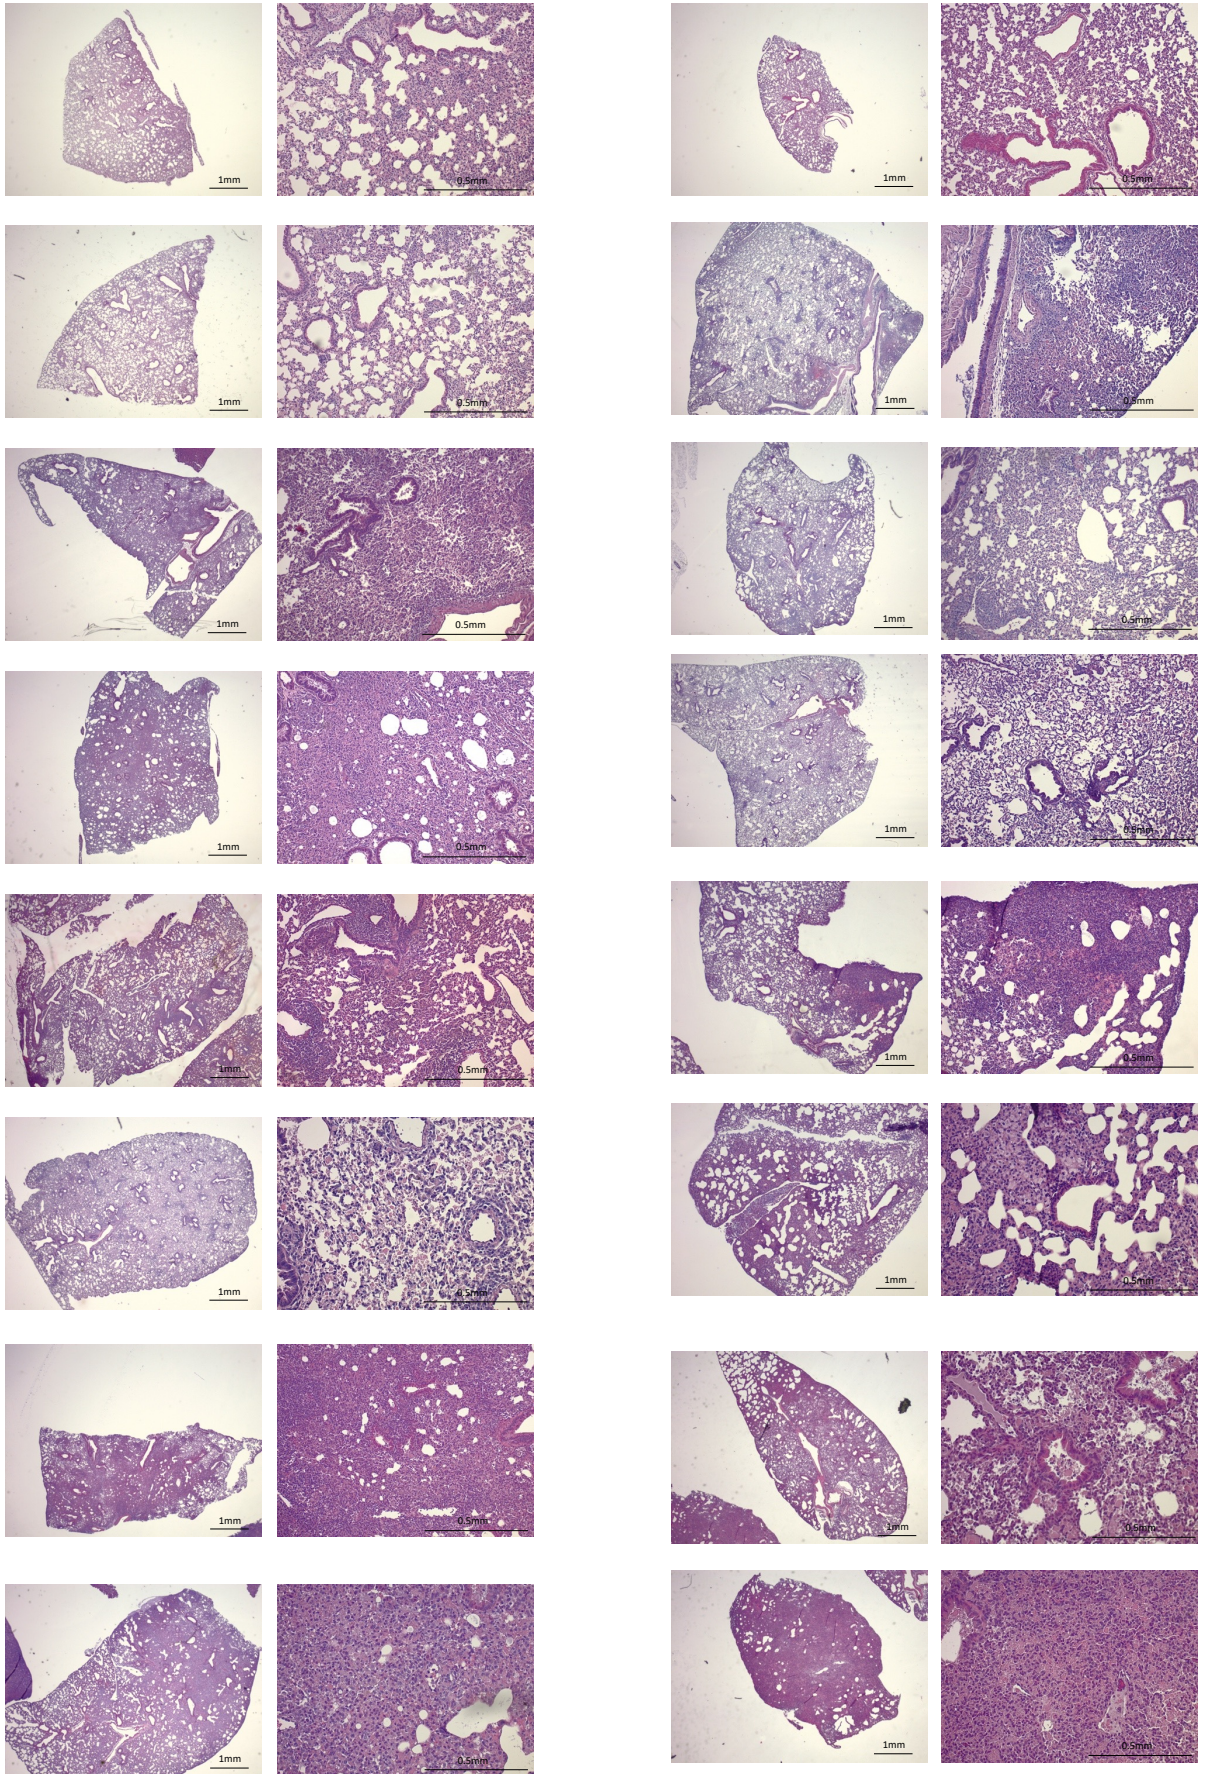

# Figure S1 continued

D.

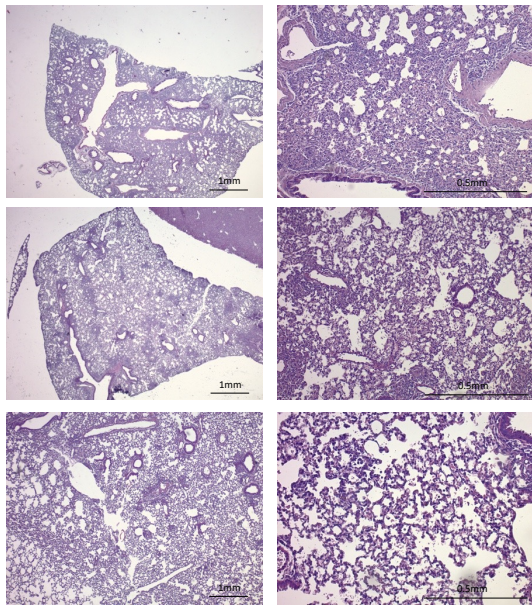

7dpi

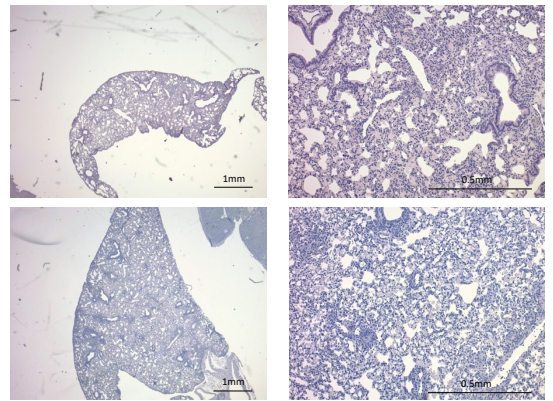

14dpi

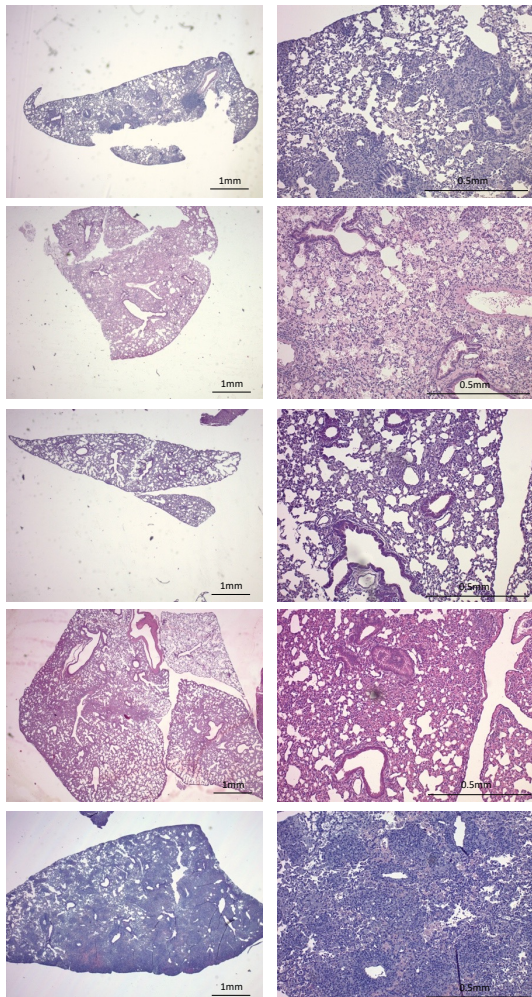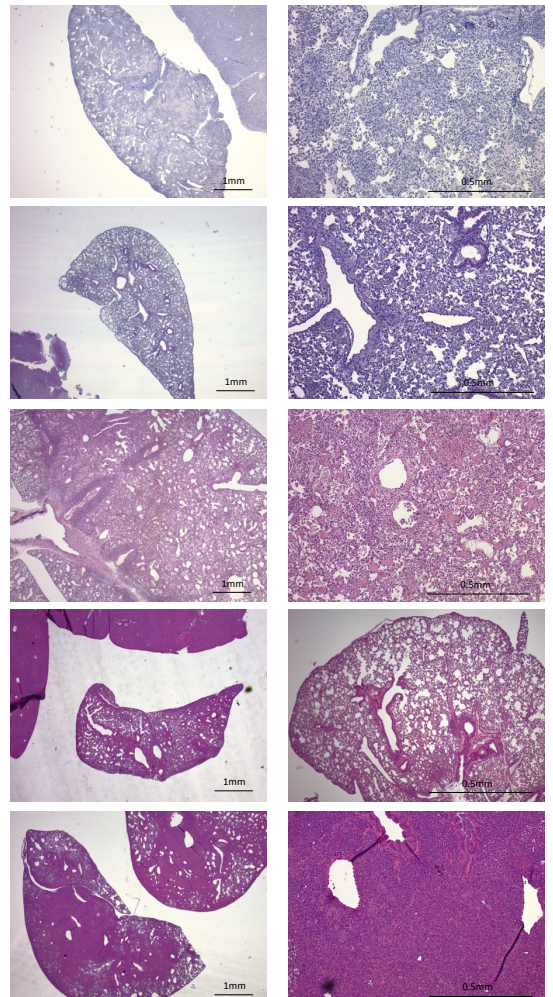

# Figure S1 continued

D.

28dpi

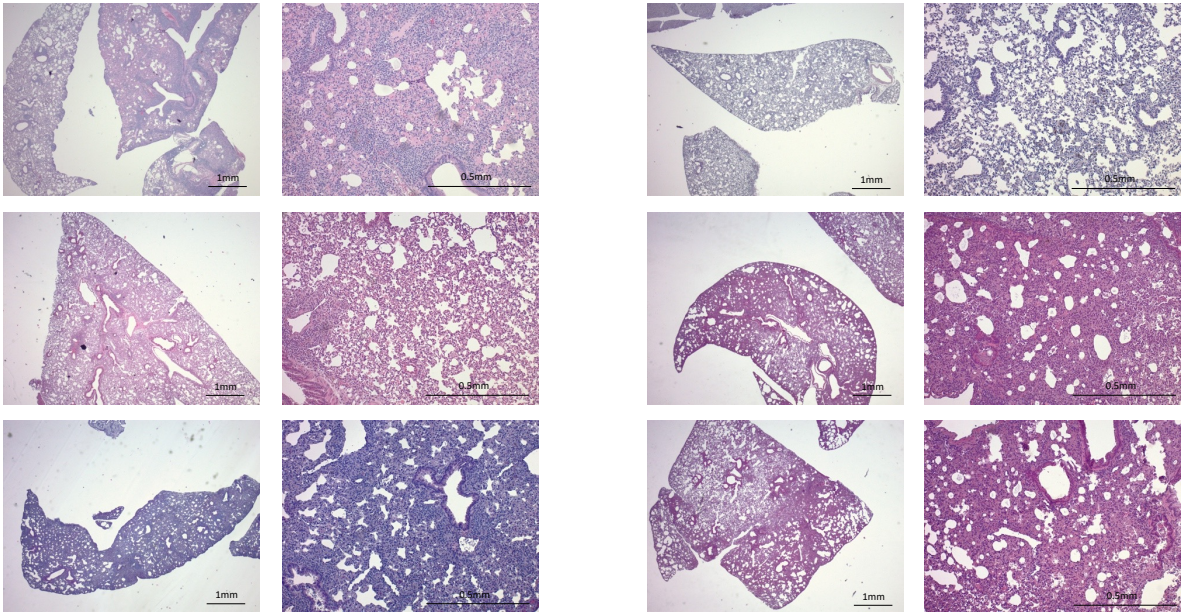

35dpi

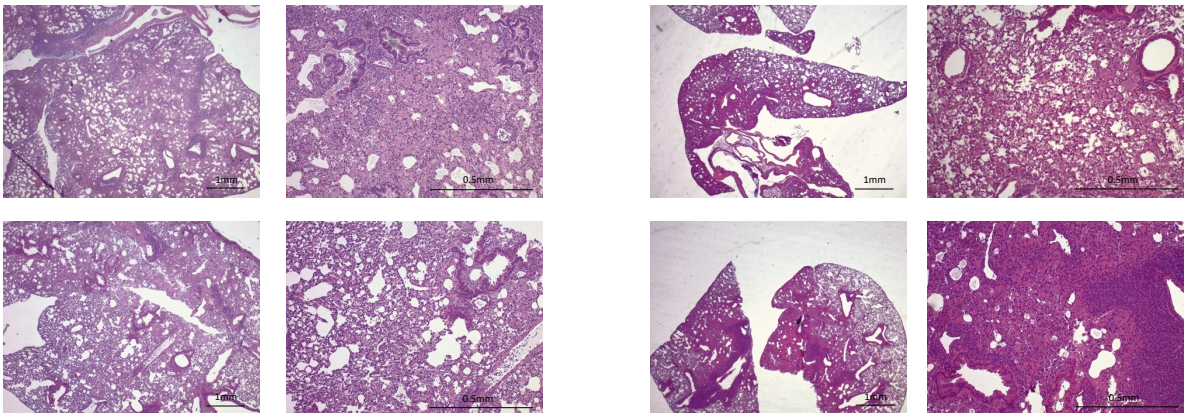

E.

Lung-28dpi

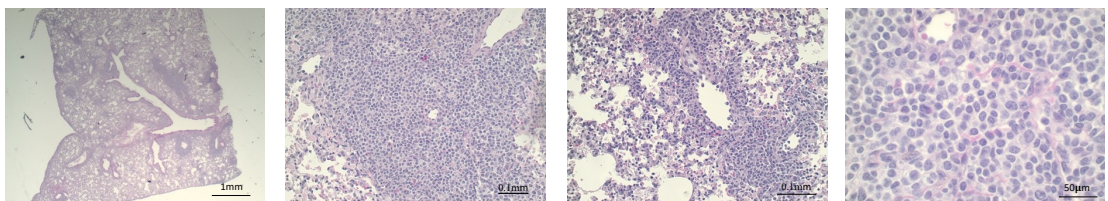

# Figure S1 continued

F.

## Uninfected

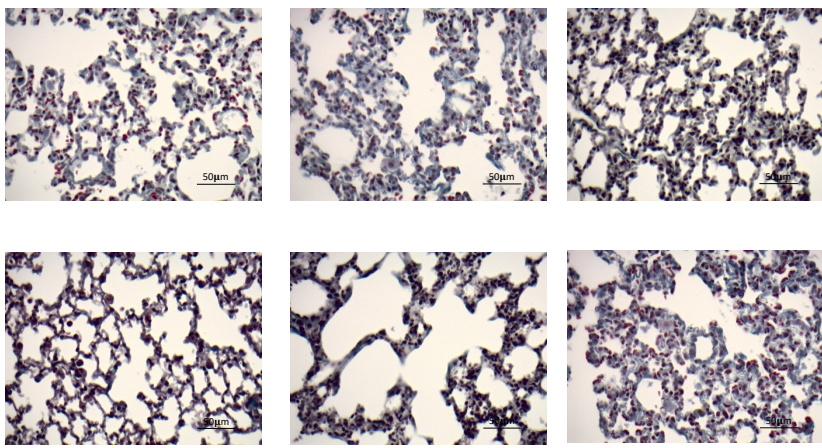

## 4dpi

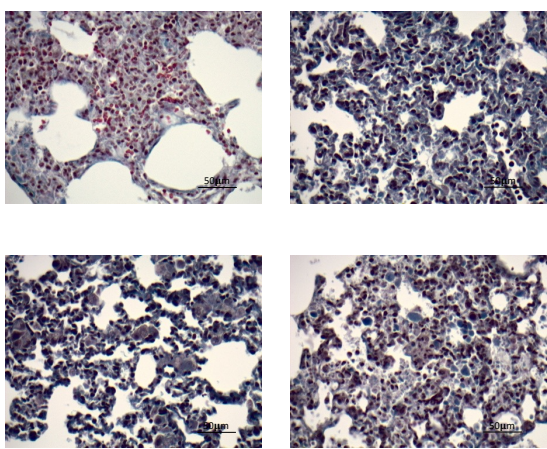

## 14dpi

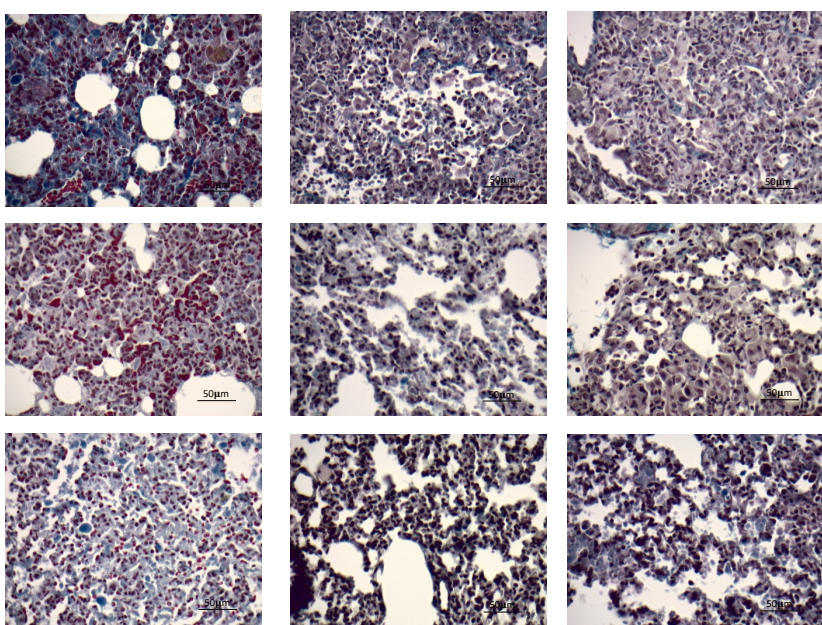

Figure S1 continued

F.

28dpi

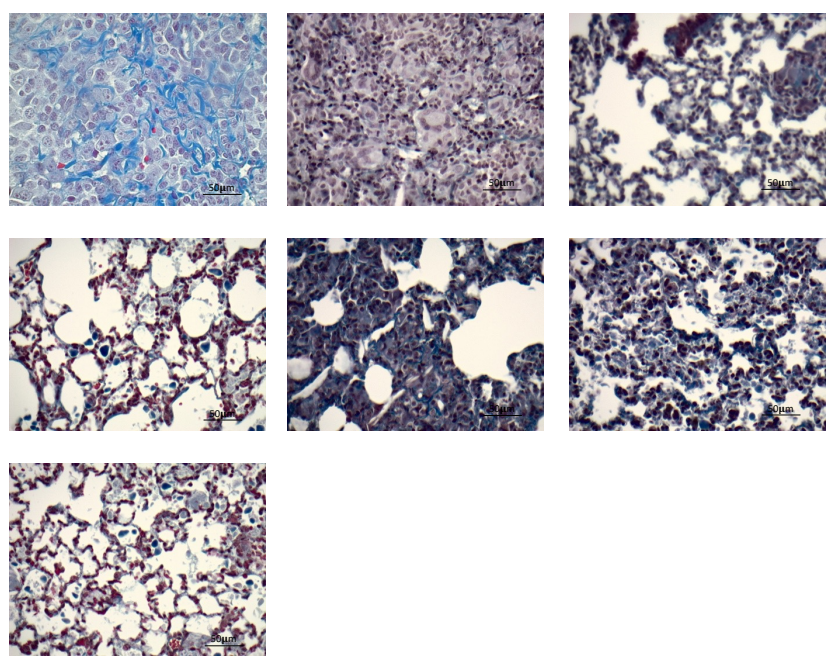

35dpi

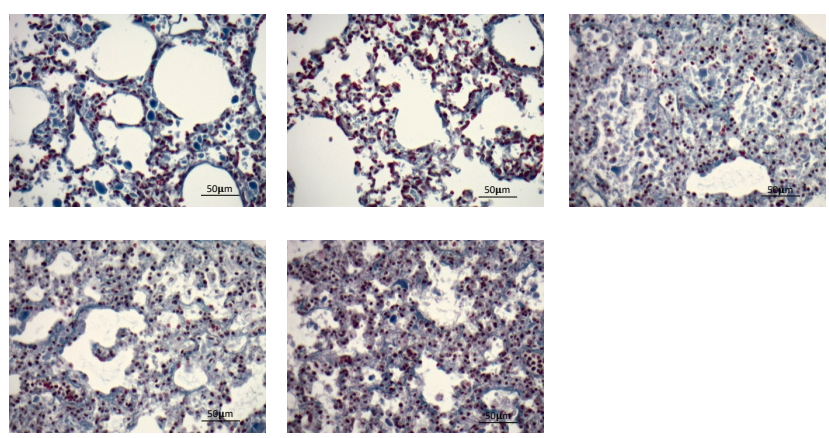

Figure S2

A.

### Lymphocytes

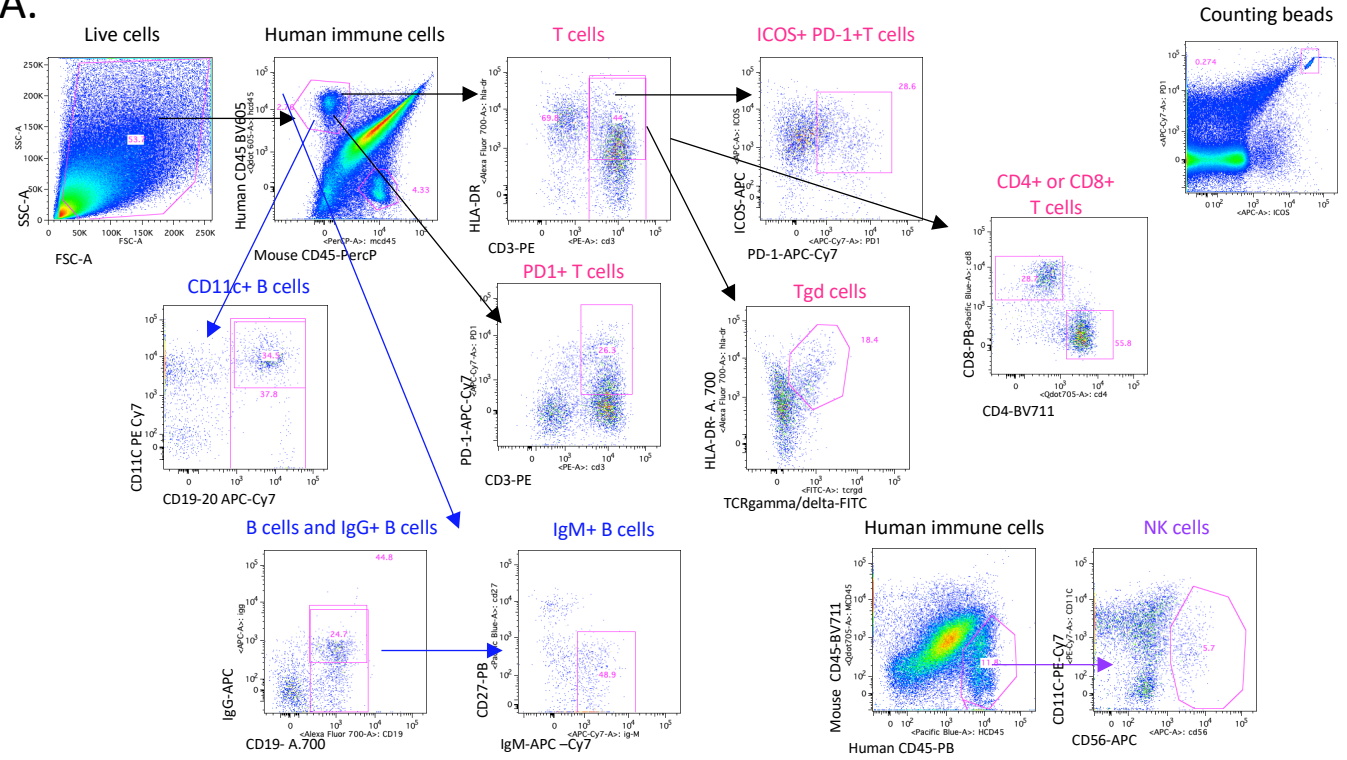

### Myeloid cells

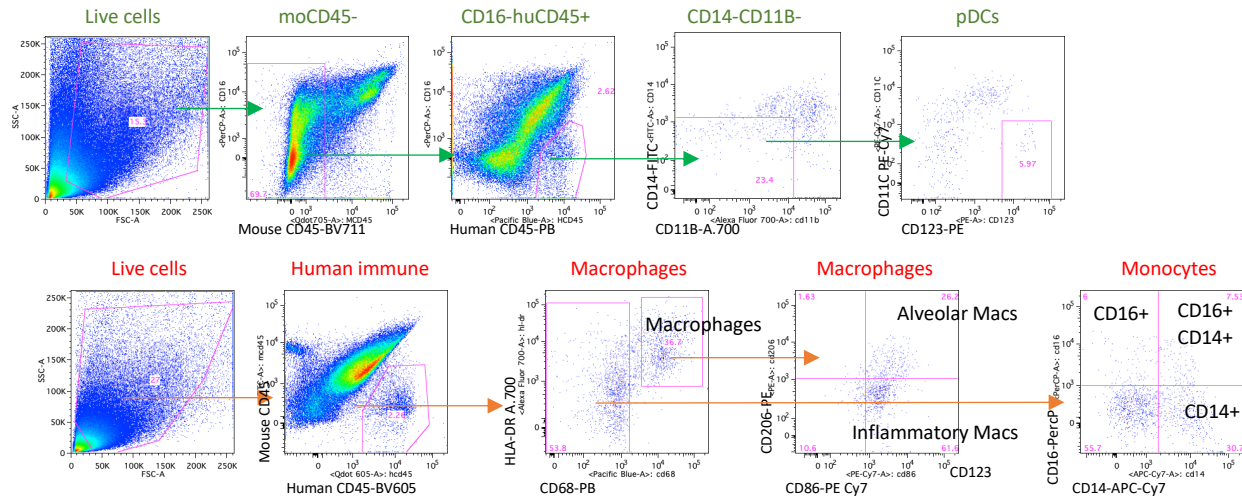

B.

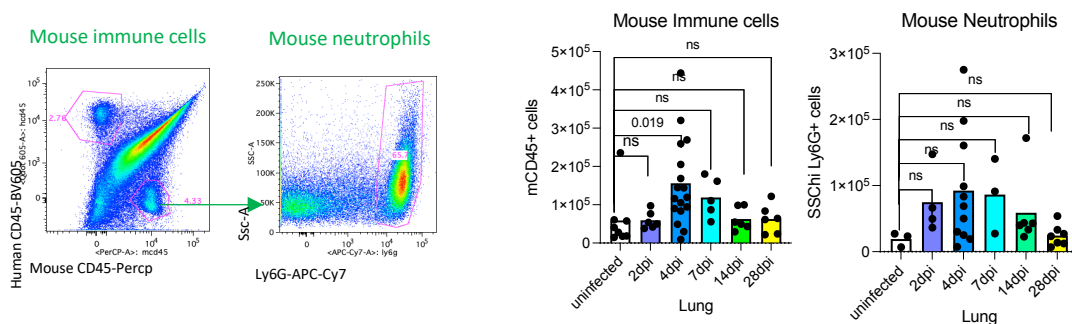

Figure S2 continued

C.

Uninfected

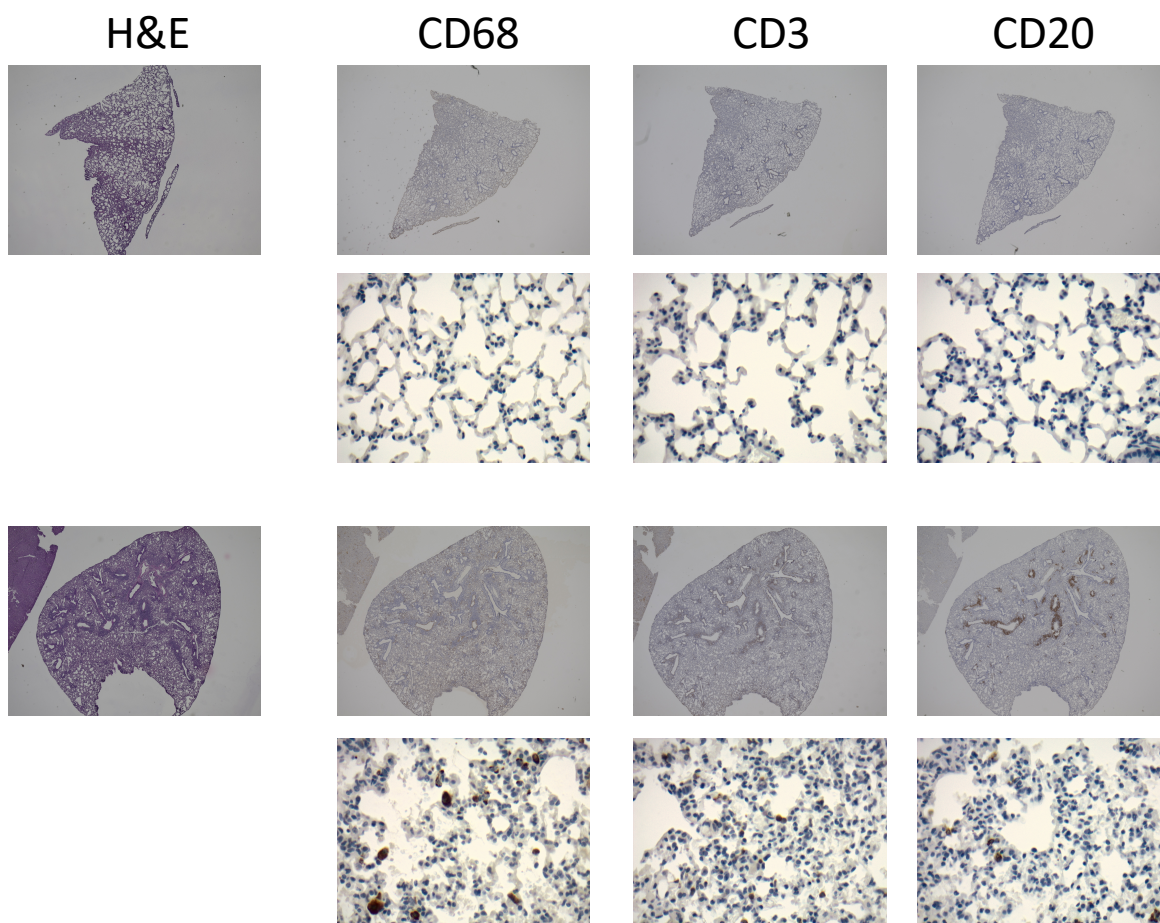



Figure S2 continued

4dpi

C.

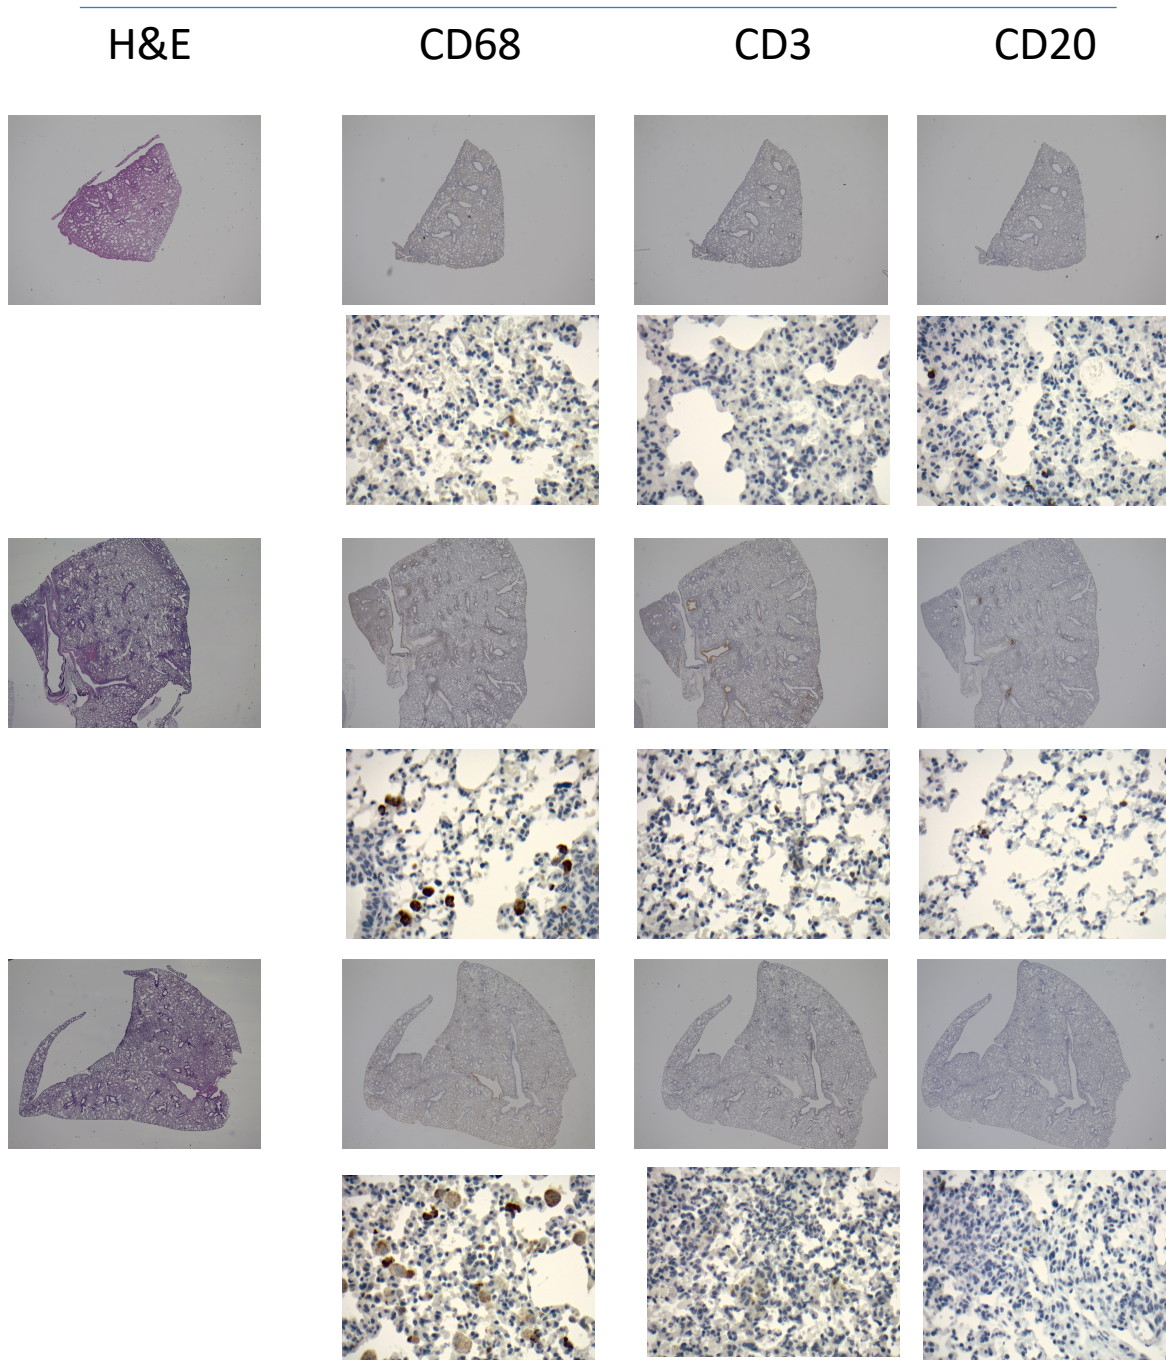

Figure S2 continued

C.

14dpi

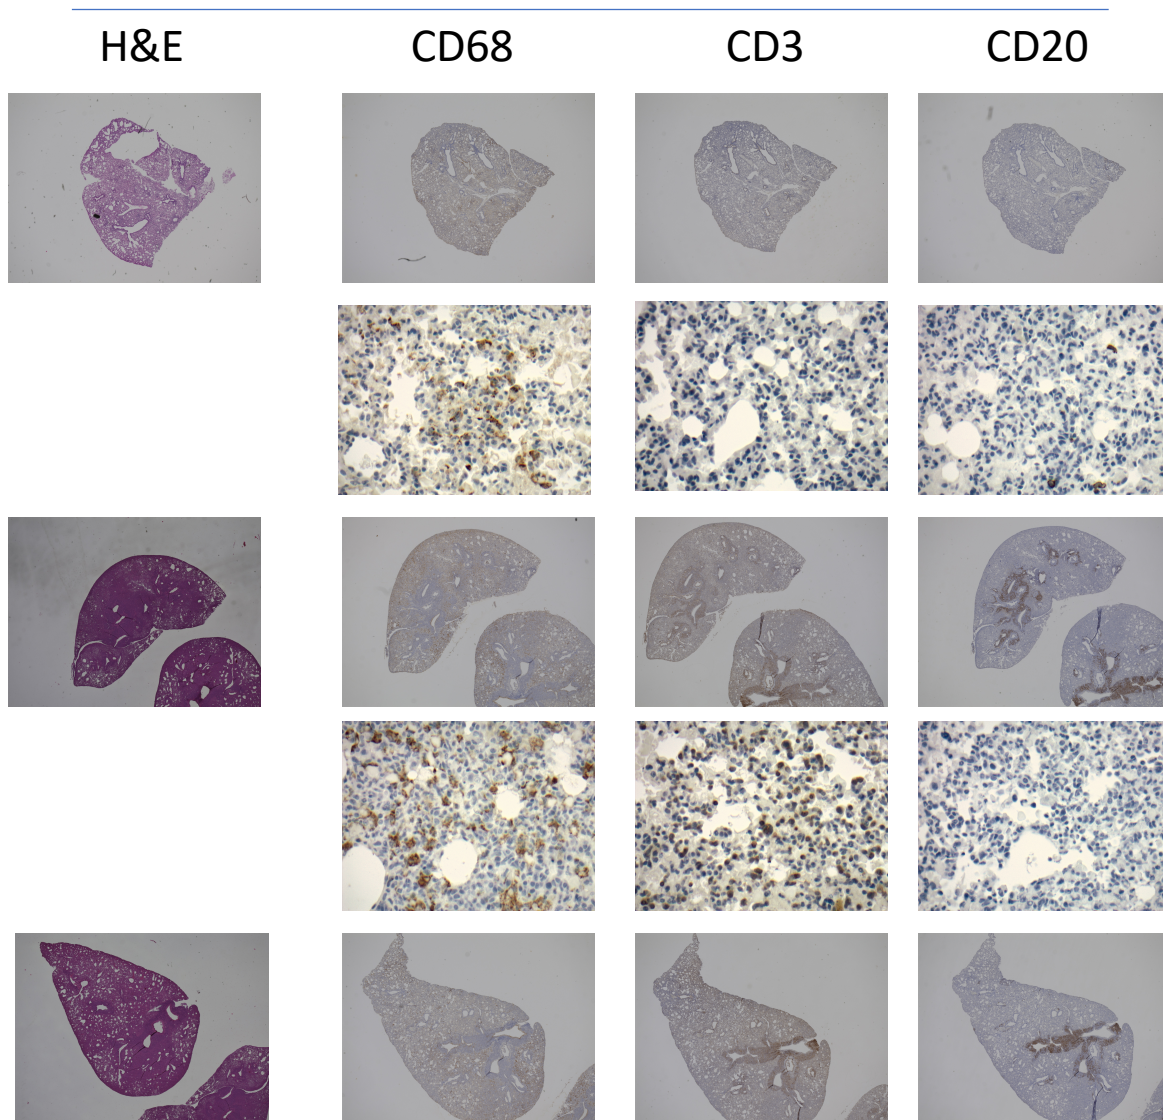

Figure S2 continued

C.

28dpi

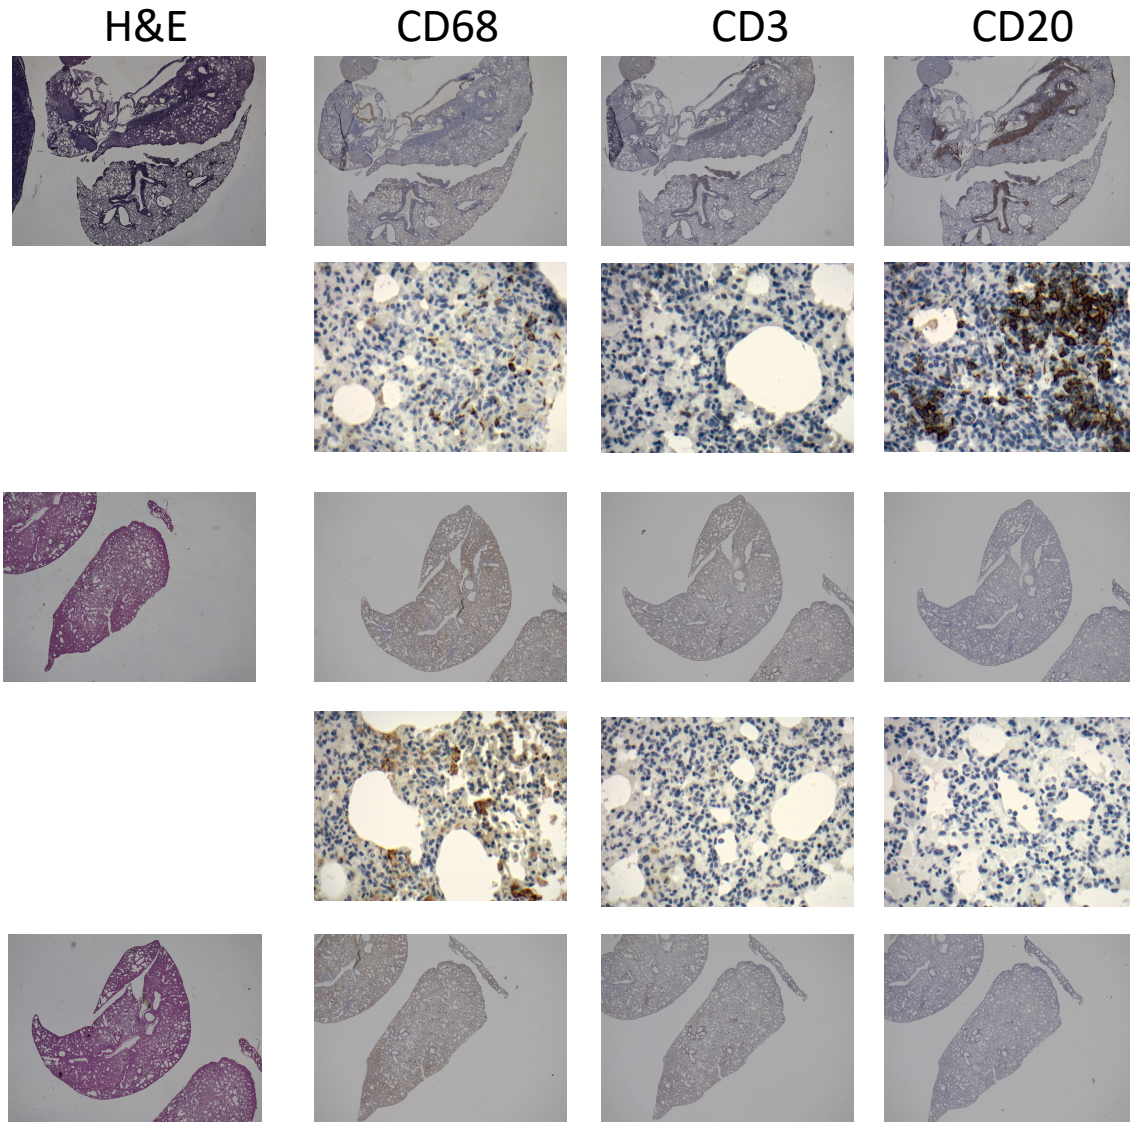

D. Quantification by IHC and FC

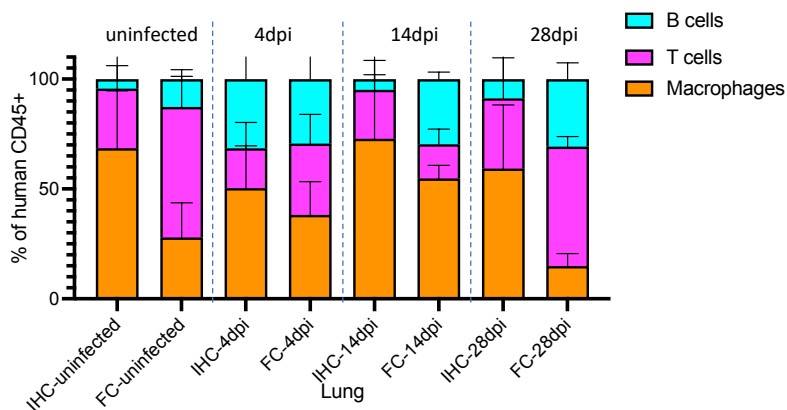

E. 14DPI Lungs

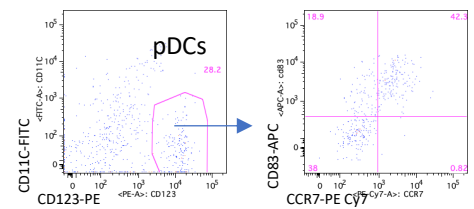

pDCs: hCD45+CD11b-CD14-CD16-  
CD3-mCD45-
